# Supplementary material for: Investigation of electronic and vibrational properties of dihydroxylammonium 5,5′-bistetrazole-1,1′-diolate under high-pressure conditions
Source: Royal Society of Chemistry journal article supplement (doi:10.1039/d0cp04470a), 2021-01-01
Supplement: d0cp04470a1.pdf [file d0cp04470a1.pdf]

## Supporting Information

### **Investigation of electronic and vibrational properties of Dihydroxylammonium 5,5'-bistetrazole-1,1'-diolate under high pressure conditions**

Junyu Fan, Yan Su,\* and Jijun Zhao

*Key Laboratory of Materials Modification by Laser, Ion and Electron Beams (Dalian University  
of Technology), Ministry of Education, Dalian, 116024, China*

---

\* Corresponding author. E-mail: su.yan@dlut.edu.cn

## 1. Raman spectra at hydrostatic conditions

The Raman characteristics under hydrostatic pressure have been well studied by Dreger and his colleagues.<sup>S1</sup> The results of hydrostatic Raman spectra in this work are consistent with the observation in previous experiments and calculations.<sup>S1</sup>

Detailed comparisons of the selected Raman shift between calculated and experimental results are presented in Figure S4. Pressure dependence of Raman spectra under hydrostatic compressions is shown in Figure 5a. The high-wavenumber modes ( $\nu_1$ – $\nu_4$ ), associated with cation moieties are predicted at 2650–3200  $\text{cm}^{-1}$ . The  $\text{NH}_2$  asymmetric stretching ( $\nu_1$ ) presents a red shift before 3 GPa, then the red shift reverts gradually to a blue shift. This fact manifests the lengthening of  $\text{N}_1$ – $\text{H}_2$  covalent bond at first and starts to shorten the  $\text{N}_1$ – $\text{H}_2$  bond due to the compression of space after 3 GPa (see section 3.1 and Figure S5). The red shift is also observed in  $\text{NH}_2$  symmetric stretch ( $\nu_2$ ) due to the slight lengthening of the  $\text{N}_1$ – $\text{H}_1$  covalent bonds with increasing pressure. Similarly, the mode mixed NH and OH character ( $\nu_4$ ) presents a red shift, while the wavenumber of  $\nu_3$  mode (NH and OH symmetrical stretching) is gradually increasing under higher pressure. From the vibrational pattern of TKX-50, we noted that the  $\text{N}_1$ – $\text{H}_3$  bond participates in  $\nu_3$  vibrational mode with the relatively strong contribution while the  $\text{O}_1$ – $\text{H}_4$  bond mainly participates in  $\nu_4$  vibrational mode. Thus, the blue shift of  $\nu_3$  and red shift of  $\nu_4$  are associated with the slight shortening of  $\text{N}_1$ – $\text{H}_1$  and lengthening of  $\text{O}_1$ – $\text{H}_4$  bonds at 0–10 GPa, respectively.

Examination of Table S2 shows that most vibrational modes of TKX-50 are combinations of both cation and anion vibrations at ambient condition. The Raman frequencies of these modes increase with elevated pressure in most case below 1600  $\text{cm}^{-1}$ . The highest coefficient (8.13  $\text{cm}^{-1} \text{GPa}^{-1}$ ) is observed for the low-frequency internal mode  $\nu_{29}$ , while the lattice modes have coefficients less than 2.99  $\text{cm}^{-1} \text{GPa}^{-1}$ . In our previous work,<sup>S2</sup> the highest coefficient of lattice modes for RDX is up to 9.0  $\text{cm}^{-1} \text{GPa}^{-1}$ , which indicate TKX-50 may have stronger intermolecular interactions than the typical nitro explosive like RDX.

Table S1. Characteristics of vibrational modes in TKX-50 crystal at ambient pressure.  $dv/dp$  is slope of pressure-induced Raman shift. Abbreviation: st: stretch, sci: scissor, bre: breathe, sym: symmetric, asym: asymmetric.

| Mode       | Wavenumber<br>/cm <sup>-1</sup> |           | sym.           | Assignment                        |                                                               | dv/dp<br>/cm <sup>-1</sup> GPa <sup>-1</sup> |                     |
|------------|---------------------------------|-----------|----------------|-----------------------------------|---------------------------------------------------------------|----------------------------------------------|---------------------|
|            | Expt. <sup>S1</sup>             | This work |                | (NH <sub>3</sub> OH) <sup>+</sup> | (C <sub>2</sub> N <sub>8</sub> O <sub>2</sub> ) <sup>2-</sup> | This work                                    | Expt. <sup>S1</sup> |
| $\nu_1$    | 3216                            | 3186      | A <sub>g</sub> | NH <sub>2</sub> asym st           |                                                               | -0.70                                        | -2.05               |
|            |                                 | 3197      | B <sub>g</sub> |                                   |                                                               |                                              |                     |
| $\nu_2$    | 3170                            | 3120      | A <sub>g</sub> | NH <sub>2</sub> sym st            |                                                               | -5.96                                        | -0.86               |
|            |                                 | 3132      | B <sub>g</sub> |                                   |                                                               |                                              |                     |
| $\nu_3$    | 2931                            | 2897      | A <sub>g</sub> | NH sym st +                       |                                                               | 6.94                                         | 4.21                |
|            |                                 | 2898      | B <sub>g</sub> | OH sym st                         |                                                               |                                              |                     |
| $\nu_4$    |                                 | 2652      | A <sub>g</sub> | NH sym st +                       |                                                               | -8.09                                        |                     |
|            |                                 | 2654      | B <sub>g</sub> | OH sym st                         |                                                               |                                              |                     |
| $\nu_5$    | 1650                            | 1586      | A <sub>g</sub> | NH <sub>2</sub> sci               |                                                               | 5.02                                         | 6.76                |
|            |                                 | 1592      | B <sub>g</sub> |                                   |                                                               |                                              |                     |
| $\nu_6$    | 1615                            | 1578      | A <sub>g</sub> | NH <sub>2</sub> sci               |                                                               | 1.69                                         | 6.04                |
|            |                                 | 1579      | B <sub>g</sub> |                                   |                                                               |                                              |                     |
| $\nu_7$    | 1592                            | 1569      | A <sub>g</sub> | NH <sub>2</sub> sci               | C-C sym st                                                    | 1.29                                         | 5.78                |
|            |                                 | 1567      | B <sub>g</sub> |                                   |                                                               |                                              |                     |
| $\nu_8$    | 1590                            | 1550      | A <sub>g</sub> | NH <sub>2</sub> sci + NH          |                                                               | -2.20                                        | -0.76               |
|            |                                 | 1558      | B <sub>g</sub> | rock + OH rock                    |                                                               |                                              |                     |
| $\nu_9$    | 1485                            | 1504      | A <sub>g</sub> | NH <sub>2</sub> sci + NH          |                                                               | -2.19                                        | 3.47                |
|            |                                 | 1516      | B <sub>g</sub> | rock + OH rock                    |                                                               |                                              |                     |
| $\nu_{10}$ | 1467                            | 1425      | A <sub>g</sub> | NH rock + OH                      | C-N sym st                                                    | 4.72                                         | 2.03                |
|            |                                 | 1431      | B <sub>g</sub> | rock                              |                                                               |                                              |                     |
| $\nu_{11}$ | 1276                            | 1250      | A <sub>g</sub> | NH rock + OH                      | (CN <sub>3</sub> ) <sub>2</sub>                               | 3.64                                         | 3.18                |
|            |                                 | 1257      | B <sub>g</sub> | rock                              | deformation                                                   |                                              |                     |
| $\nu_{12}$ | 1239                            | 1212      | A <sub>g</sub> | NH rock + OH                      |                                                               | 2.58                                         | 3.71                |
|            |                                 | 1221      | B <sub>g</sub> | rock                              |                                                               |                                              |                     |
| $\nu_{13}$ | 1185                            | 1202      | A <sub>g</sub> | NH rock + OH                      | (N <sub>3</sub> ) <sub>2</sub> sci                            | 3.42                                         | 2.14                |
|            |                                 | 1203      | B <sub>g</sub> | rock                              |                                                               |                                              |                     |
| $\nu_{14}$ | 1171                            | 1159      | A <sub>g</sub> | NH rock + OH                      |                                                               | -0.94                                        | 1.33                |
|            |                                 | 1167      | B <sub>g</sub> | rock                              |                                                               |                                              |                     |
| $\nu_{15}$ | 1133                            | 1094      | A <sub>g</sub> |                                   | (N <sub>3</sub> ) <sub>2</sub> sci                            | 3.19                                         | 2.64                |
|            |                                 | 1095      | B <sub>g</sub> |                                   |                                                               |                                              |                     |
| $\nu_{16}$ | 1116                            | 1067      | A <sub>g</sub> | NH rock + OH                      | (N <sub>3</sub> ) <sub>2</sub> sci                            | 4.71                                         | 3.09                |
|            |                                 | 1067      | B <sub>g</sub> | rock                              |                                                               |                                              |                     |
| $\nu_{17}$ | 1016                            | 1007      | A <sub>g</sub> | NO sym st +                       |                                                               | 4.62                                         | 4.75                |
|            |                                 | 1010      | B <sub>g</sub> | NH <sub>3</sub> OH bre            |                                                               |                                              |                     |
| $\nu_{18}$ | 1006                            | 963       | A <sub>g</sub> |                                   | C-N sym st                                                    | 2.45                                         | 2.17                |

|                 |     |     |                |                                   |                           |      |      |
|-----------------|-----|-----|----------------|-----------------------------------|---------------------------|------|------|
|                 |     | 965 | B <sub>g</sub> |                                   | + N-N-N sci               |      |      |
| v <sub>19</sub> |     | 867 | A <sub>g</sub> | OH rock                           |                           | 6.39 |      |
|                 |     | 873 | B <sub>g</sub> |                                   |                           |      |      |
| v <sub>20</sub> | 761 | 755 | A <sub>g</sub> | OH wag                            | Ring                      | 3.75 | 3.79 |
|                 |     | 755 | B <sub>g</sub> |                                   | deformation               |      |      |
| v <sub>21</sub> | 742 | 714 | A <sub>g</sub> |                                   | Ring                      | 0.02 | 0.29 |
|                 |     | 714 | B <sub>g</sub> |                                   | deformation<br>+ C-C rock |      |      |
| v <sub>22</sub> | 701 | 663 | A <sub>g</sub> |                                   | Ring                      | 1.16 | 1.12 |
|                 |     | 664 | B <sub>g</sub> |                                   | deformation<br>+ C-C rock |      |      |
| v <sub>23</sub> | 610 | 598 | A <sub>g</sub> | OH st                             | Ring rock                 | 2.14 | 2.17 |
|                 |     | 598 | B <sub>g</sub> |                                   |                           |      |      |
| v <sub>24</sub> | 433 | 431 | A <sub>g</sub> | NH <sub>3</sub> rock + OH<br>rock | Ring<br>deformation       | 4.15 | 2.71 |
|                 |     | 427 | B <sub>g</sub> |                                   |                           |      |      |
| v <sub>25</sub> | 407 | 404 | A <sub>g</sub> |                                   | Ring                      | 3.17 | 3.01 |
|                 |     | 403 | B <sub>g</sub> |                                   | deformation               |      |      |
| v <sub>26</sub> | 333 | 350 | A <sub>g</sub> | NH <sub>3</sub> rock              |                           | 5.78 | 4.64 |
|                 |     | 347 | B <sub>g</sub> |                                   |                           |      |      |
| v <sub>27</sub> | 295 | 328 | A <sub>g</sub> | NH <sub>3</sub> rock + OH         |                           | 5.61 | 7.90 |
|                 |     | 344 | B <sub>g</sub> | st                                |                           |      |      |
| v <sub>28</sub> |     | 308 | A <sub>g</sub> | NH <sub>3</sub> rock + OH         |                           | 6.56 |      |
|                 |     | 303 | B <sub>g</sub> | st                                |                           |      |      |
| v <sub>29</sub> | 256 | 278 | A <sub>g</sub> | NH <sub>3</sub> rock + OH         | Ring                      | 8.13 | 9.76 |
|                 |     | 262 | B <sub>g</sub> | st                                | deformation               |      |      |
| v <sub>30</sub> | 220 | 229 | A <sub>g</sub> | NH <sub>3</sub> st                |                           | 5.58 | 7.31 |
|                 |     | 239 | B <sub>g</sub> |                                   |                           |      |      |
| v <sub>31</sub> | 196 | 209 | A <sub>g</sub> | rotation                          | Ring                      | 4.88 | 5.42 |
|                 |     | 215 | B <sub>g</sub> |                                   | deformation               |      |      |
| v <sub>32</sub> | 139 | 146 | A <sub>g</sub> | rotation                          | Ring                      | 7.12 | 6.78 |
|                 |     | 168 | B <sub>g</sub> |                                   | deformation               |      |      |
| v <sub>33</sub> | 121 | 130 | A <sub>g</sub> | translation                       | Ring                      | 4.75 | 7.46 |
|                 |     | 131 | B <sub>g</sub> |                                   | deformation               |      |      |
| v <sub>34</sub> | 115 | 113 | A <sub>g</sub> | rotation                          | Ring                      | 2.46 | 7.14 |
|                 |     | 125 | B <sub>g</sub> |                                   | deformation               |      |      |
| v <sub>35</sub> | 103 | 103 | A <sub>g</sub> | translation                       | Ring                      | 1.17 | 3.18 |
|                 |     | 117 | B <sub>g</sub> |                                   | deformation               |      |      |
| v <sub>36</sub> | 58  | 62  | A <sub>g</sub> | rotation                          | rotation                  | 2.99 | 2.54 |
|                 |     | 71  | B <sub>g</sub> |                                   |                           |      |      |

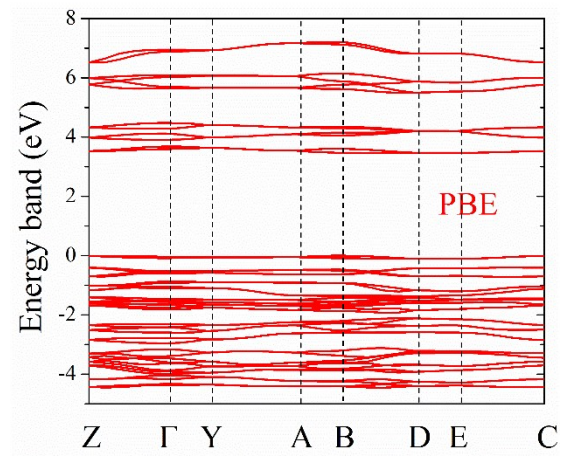

Figure S1. The electronic structure of TKX-50 at ambient condition.

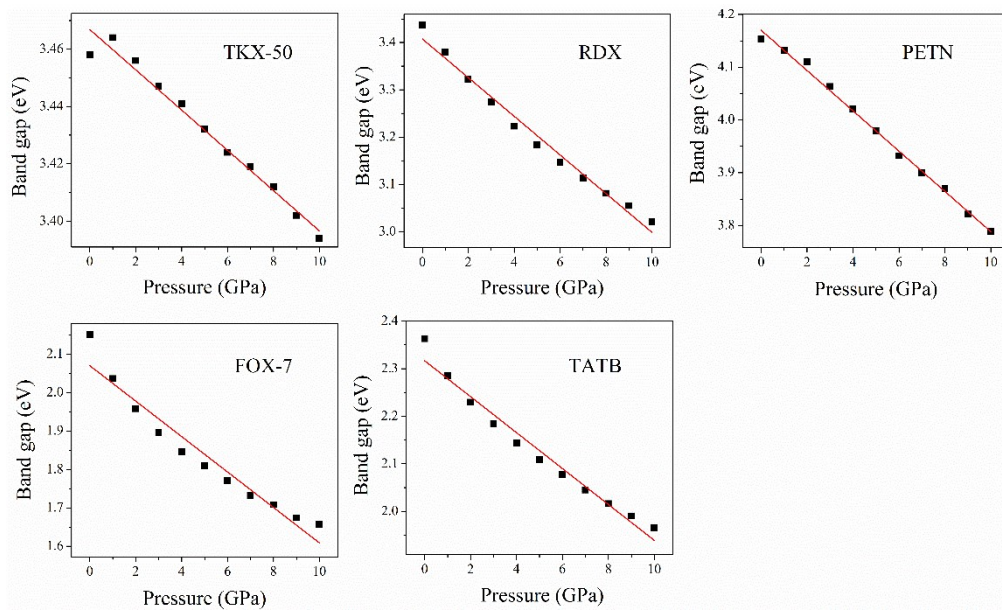

Figure S2. The evolutions of band gap of five energetic materials under hydrostatic pressure. The least-squares fitting is used to examine slop of band gap.

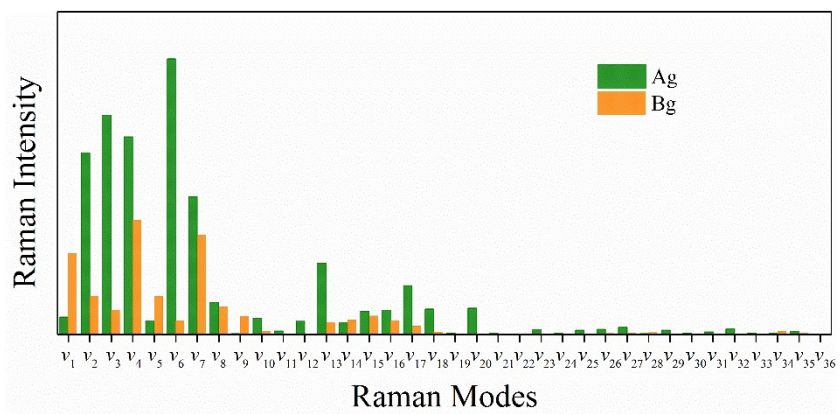

Figure S3. The intensities of  $A_g$  and  $B_g$  symmetry of modes are compared at 0K.

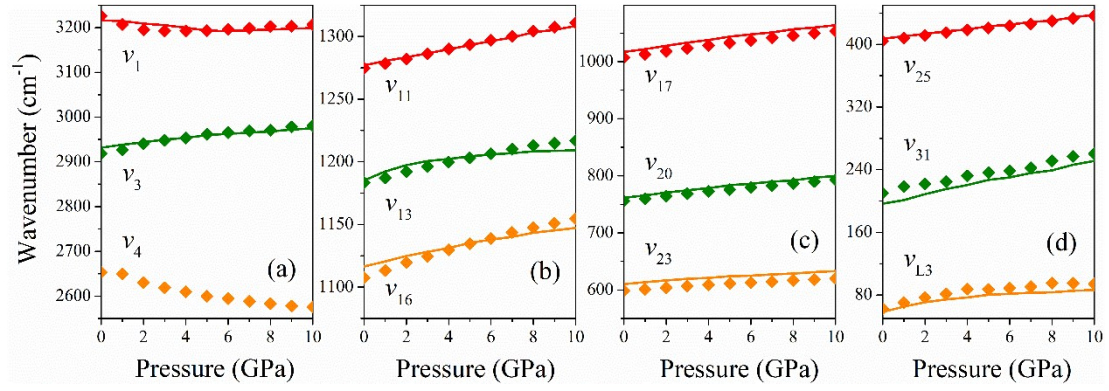

Figure S4. Raman shifts of selected characteristic peaks under pressure. The dots and lines depict the Raman shifts of this work and experiment, respectively. The calculated frequencies at all pressures are shifted by the same amount so that the calculated values and the experimental values match at ambient pressure.



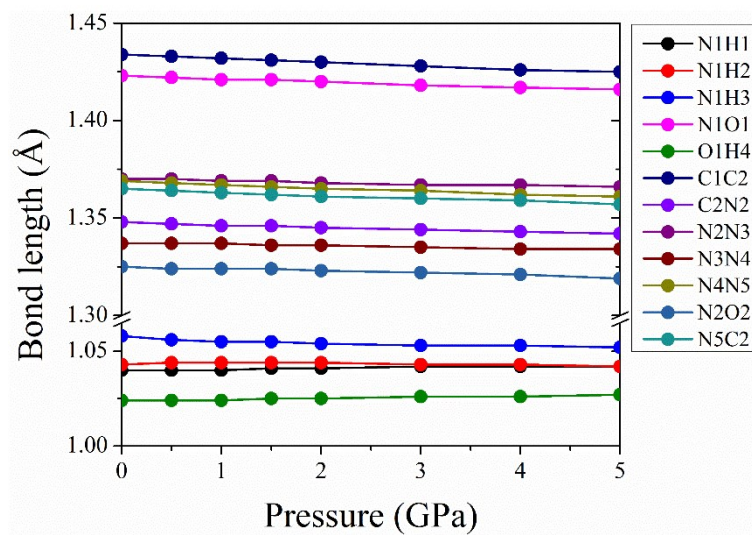

Figure S5. The pressure dependence of molecular bond lengths.

## References

- S1 Z. A. Dreger, Y. Tao, B. B. Averkiev, Y. M. Gupta and T. M. Klapotke, *J. Phys. Chem. B*, 2015, **119**, 6836-6847.
- S2 J. Fan, Y. Su, Z. Zheng, Q. Zhang and J. Zhao, *J. Raman Spectrosc.*, 2019, **50**, 889-898.
